# Supplementary material
Source: ML conference proceedings conference paper supplement (https://aclanthology.org/2025.chum-1.4)

# Raw Pun Ratings

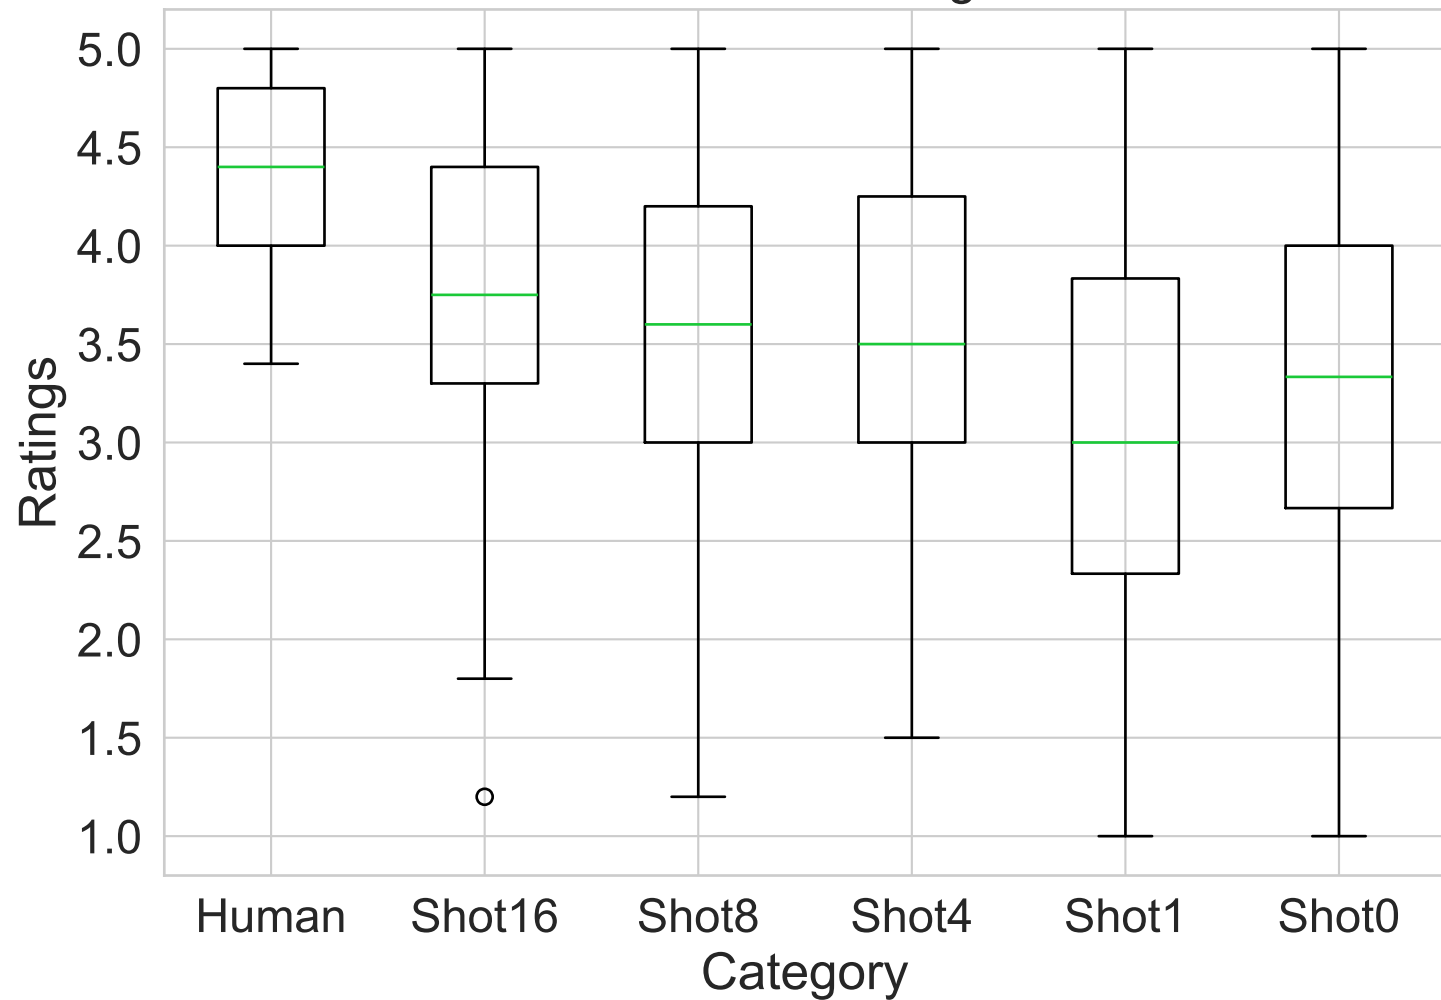

Supplement: OptionalSupplementaryMaterial [file 2025.chum-1.4.OptionalSupplementaryMaterial.zip]

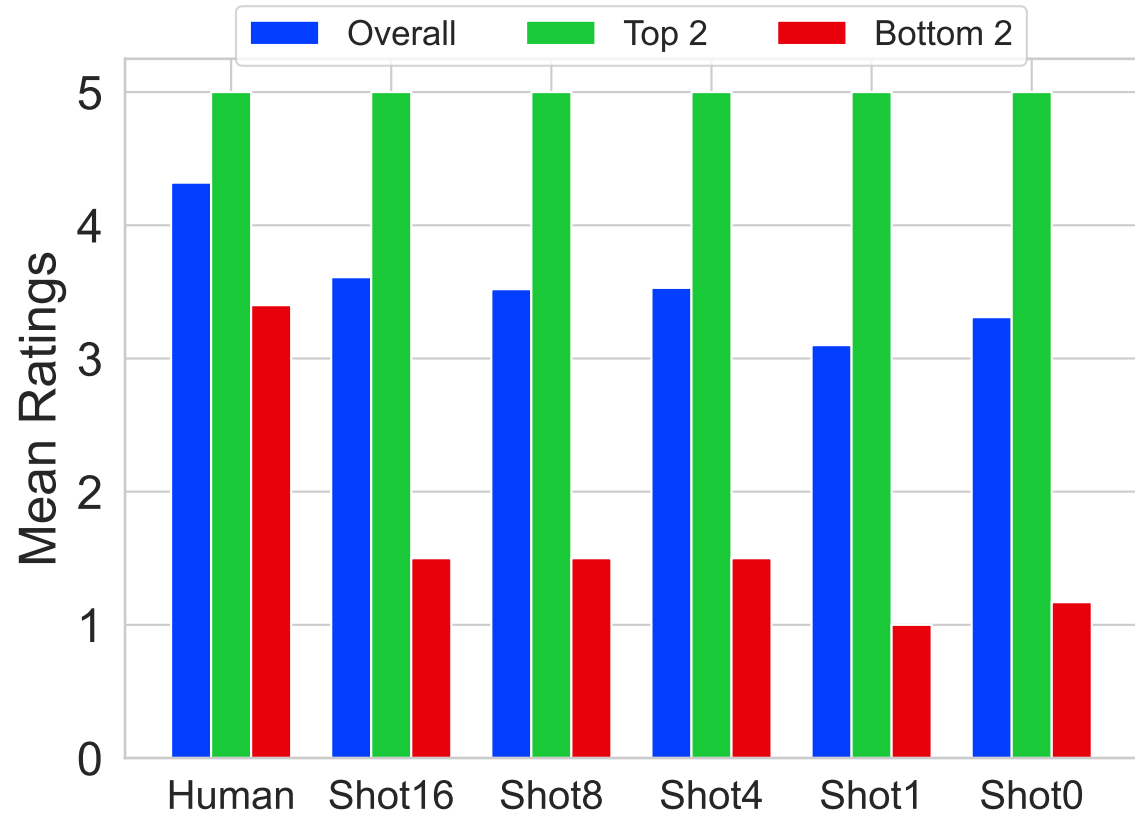

Supplement: OptionalSupplementaryMaterial [file 2025.chum-1.4.OptionalSupplementaryMaterial.zip]

Normalised Pun Ratings Per Category

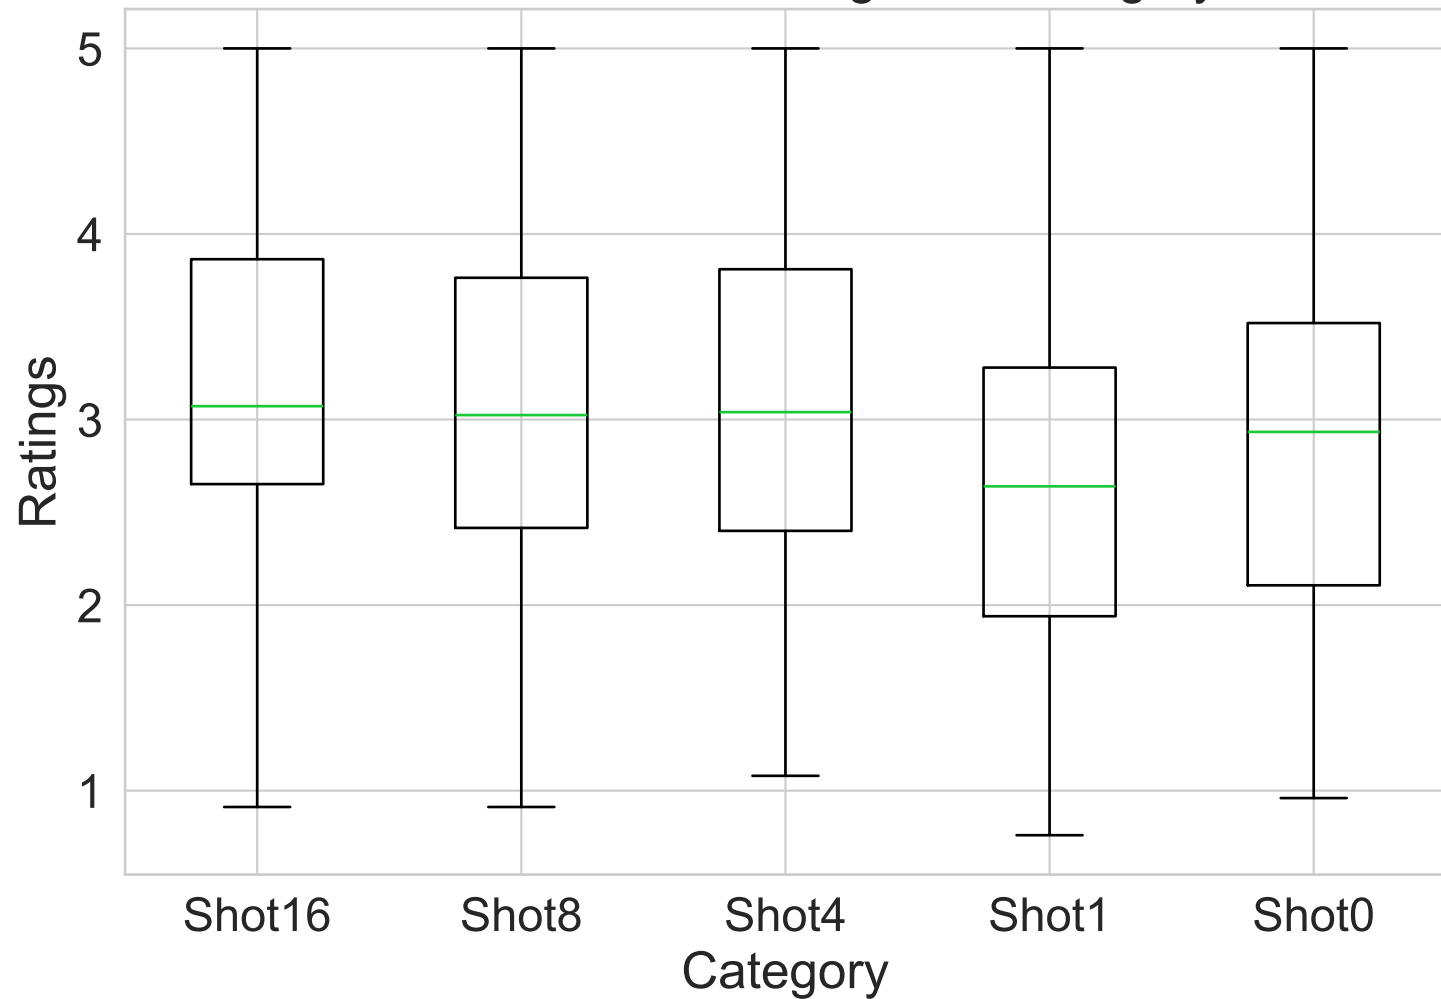

Supplement: OptionalSupplementaryMaterial [file 2025.chum-1.4.OptionalSupplementaryMaterial.zip]
